# Supplementary material for: In situ video-STM studies of the mechanisms and dynamics of electrochemical bismuth nanostructure formation on Au
Source: Royal Society of Chemistry journal article supplement (doi:10.1039/c6fd00086j), 2016-01-01
Supplement: c6fd00086j1.pdf [file c6fd00086j1.pdf]

### Supplementary Information (STM videos)

**Video 1** High-resolution *in situ* STM video sequence showing fluctuations at the tip of a needle-like Bi island on Au(111) at -0.19 V. The video was recorded at 10 Hz, but is converted to display at real time.

**Video 2** High-resolution *in situ* STM video sequence showing kink propagation along the edge of a needle-like Bi island on Au(111) at -0.40 V. The video was recorded at 10 Hz, but is converted to display at real time.
